# Supplementary material
Source: Springer Nature journal article supplement (https://www.springermedizin.de/resource/supplementary/12936_2011_1946_MOESM21_ESM.pdf/9542110)
Supplement: MOESM21 [file 9542110]

# DUO-COTECXIN®

Dihydroartémisinine / Piperaquine phosphate

Adults  
Children  
over 6 years old

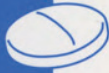

8 scored tablets

华立科泰  
HOLLEY-COTEC

Indications :  
Prescription only.  
Read carefully insert notice.  
Keep out of the reach of children.

DUO-COTECXIN®  
Manufactured by: Jiaxing Nanhu Pharmaceutical Co., Ltd  
No.205, Yunhai Road, Economy Development Zone, Jiaxing City  
Under license of Holleypharm  
MFD: 11 04 2007  
EXP: 04 / 2009  
LOT: 010106

华立科泰  
HOLLEY-COTEC

Adultes  
Enfants  
plus de 6 ans

8 comprimés  
sécables

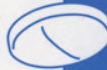

DUO-COTECXIN®  
Dihydroartémisinine / Piperaquine phosphate

Indications :  
Sur ordonnance uniquement.  
Lire attentivement la notice.  
Garder hors de portée des enfants.

DUO-COTECXIN® voie orale  
Composition par comprimé :  
Dihydroartémisinine.....40 mg  
Piperaquine phosphate.....320 mg

DUO-COTECXIN® oral route  
Composition par tablet :  
Dihydroartémisinine.....40 mg  
Piperaquine phosphate.....320 mg
